# Supplementary material
Source: Elsevier journal article supplement (https://www.sciencedirect.com/science/article/pii/S1885585716304674)
Supplement: mmc1 [file mmc1.pdf]

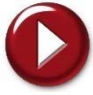

**Material suplementario**

---

**Cardio-Onco-Hematología en la práctica clínica.**

**Documento de consenso y recomendaciones**

---

## MATERIAL SUPLEMENTARIO

Tabla 1 del material suplementario

Toxicidad cardiovascular por antitumorales<sup>8-10</sup>

| Toxicidad cardiovascular | Grupos farmacológicos                                                                                                                                                                                                                                                                          | Fármacos asociados con más frecuencia a toxicidad cardiovascular                                                                                                                                                                                                                       |
|--------------------------|------------------------------------------------------------------------------------------------------------------------------------------------------------------------------------------------------------------------------------------------------------------------------------------------|----------------------------------------------------------------------------------------------------------------------------------------------------------------------------------------------------------------------------------------------------------------------------------------|
| Insuficiencia cardíaca   | Antraciclinas<br>Alquilantes (mostazas nitrogenadas)<br>Antimicrotúbulos (taxanos)<br>Anticuerpos monoclonales<br>Inhibidores de tirosincinasa<br>Inhibidores de proteosomas                                                                                                                   | Doxorubicina, daunorubicina, idarubicina, epirubicina, mitoxantrona<br>Ciclofosfamida, ifosfamida<br>Docetaxel<br>Trastuzumab, bevacizumab<br>Sunitinib, pazopanib, sorafenib, imatinib, dasatinib, lapatinib, nilotinib<br>Carfilzomib, bortezomib                                    |
| Miopericarditis          | Antraciclinas<br>Alquilantes (mostazas nitrogenadas)<br>Anticuerpos monoclonales<br>Antimetabolitos (análogos de pirimidina)<br>Otros                                                                                                                                                          | Doxorubicina<br>Ciclofosfamida<br>Trastuzumab, rituximab<br>5-fluorouracilo, citarabina<br>Interleucina 2                                                                                                                                                                              |
| Cardiopatía isquémica    | Antimetabolitos (análogos de pirimidina)<br>Alquilantes (platinos)<br>Antimicrotúbulos (taxanos)<br>Inhibidores de tirosincinasa<br>Inhibidores topoisomerasa II<br>Antibiótico antitumoral                                                                                                    | 5-fluorouracilo, capecitabina<br>Cisplatino<br>Paclitaxel, docetaxel<br>Bevacizumab, sorafenib, sunitinib<br>Etopósido<br>Bleomicina                                                                                                                                                   |
| Fibrilación auricular    | Alquilantes (mostazas nitrogenadas)<br>Antraciclinas<br>Antimetabolito (análogos de pirimidina)<br>Anticuerpos monoclonales<br>Inhibidores de tirosincinasa<br>Inhibidores de topoisomerasa II<br>Antimicrotúbulos (taxanos)<br>Inhibidores de proteosomas<br>Inhibidores de histonas<br>Otros | Cisplatino, ciclofosfamida, ifosfamida, melfalán<br>Doxorubicina<br>Capecitabina, 5-fluorouracilo, gemcitabina<br>Rituximab<br>Ponatinib, sorafenib, sunitinib, ibrutinib<br>Etopósido<br>Paclitaxel<br>Bortezomib<br>Romidepsina<br>Interleucina 2, interferón, radioterapia torácica |
| Prolongación del QT      | Antraciclinas<br>Inhibidores de histonas<br>Inhibidores de tirosincinasa<br><br>Otros                                                                                                                                                                                                          | Doxorubicina<br>Depsiptérido, vorinostat<br>Axitinib, cabozantinib, crizotinib, dasatinib, lapatinib, nilotinib, sorafenib, sunitinib, vandetanib, vemurafenib<br>Trióxido de arsénico                                                                                                 |
| Bradiarritmias           | Alquilantes<br>Antraciclinas<br>Antimetabolitos (análogos de pirimidina)<br>Inhibidores de tirosincinasa<br>Inhibidores de proteosomas<br>Antimicrotúbulos (taxanos)<br>Inmunomoduladores<br>Anticuerpo monoclonal<br>Otros                                                                    | Cisplatino, ciclofosfamida, ifosfamida<br>Doxorubicina, epirubicina, mitoxantrona<br>Capecitabina, 5-fluorouracilo, gemcitabina<br>Imatinib<br>Bortezomib<br>Paclitaxel<br>Talidomida<br>Rituximab<br>Trióxido de arsénico, interleucina 2                                             |
| Hipertensión arterial    | Anticuerpos monoclonales<br>Inhibidores de tirosincinasa                                                                                                                                                                                                                                       | Bevacizumab<br>Sorafenib, sunitinib, axitinib, vandetanib, regorafenib                                                                                                                                                                                                                 |

|                                    |                                                                                                                                                                                            |                                                                                                                                                            |
|------------------------------------|--------------------------------------------------------------------------------------------------------------------------------------------------------------------------------------------|------------------------------------------------------------------------------------------------------------------------------------------------------------|
| Hipertensión pulmonar              | Inhibidores de tirosincinasa<br>Alquilantes (mostazas nitrogenadas)                                                                                                                        | Dasatinib<br>Ciclofosfamida                                                                                                                                |
| Enfermedad tromboembólica venosa   | Inmunomoduladores<br>Antimetabolito (análogos de pirimidina)<br>Alquilantes (platinos)<br>Inhibidores de tirosincinasa<br>Anticuerpos monoclonales<br>Inhibidores de histona<br>Otros      | Talidomida, lenalidomida y pomalidomida<br>5-fluorouracilo<br>Cisplatino<br>Nilotinib, ponatinib, erlotinib<br>Bevacizumab<br>Vorinostat<br>L-asparaginasa |
| Enfermedad tromboembólica arterial | Alquilantes (platinos)<br>Antimetabolitos (análogos de pirimidina)<br>Antibióticos antitumoral<br>Inhibidores tirosincinasa<br>Anticuerpos monoclonales<br>Alcaloides de la vinca<br>Otros | Cisplatino, carboplatino<br>Gemcitabina<br>Bleomicina<br>Nilotinib, ponatinib<br>Bevacizumab<br>Vincristina<br>Interferón alfa                             |
| Derrame pericárdico                | Alquilantes (mostazas nitrogenadas)<br>Radioterapia torácica                                                                                                                               | Ciclofosfamida                                                                                                                                             |
| Arterioesclerosis acelerada        | Radioterapia torácica<br>Inhibidores de tirosincinasa<br>Inhibidores de proteosomas                                                                                                        | Véase figura 3 del artículo completo<br>Bevacizumab, nilotinib, ponatinib<br>Carfilzomib, bortezomib                                                       |

**Tabla 2 del material suplementario**Grupos farmacológicos, mecanismo de acción y toxicidad cardiovascular<sup>8-10</sup>

| Clase                                             | Mecanismo de acción                                         | Agentes y toxicidad cardiovascular                                                                                                                                                                                                                                                                                                                                                                                                                                                                                                                                                      |
|---------------------------------------------------|-------------------------------------------------------------|-----------------------------------------------------------------------------------------------------------------------------------------------------------------------------------------------------------------------------------------------------------------------------------------------------------------------------------------------------------------------------------------------------------------------------------------------------------------------------------------------------------------------------------------------------------------------------------------|
| Alquilantes                                       | En ADN incorporando grupos alquilo                          | Ciclofosfamida: miocarditis, pericarditis, arritmias, hipertensión pulmonar venooclusiva, hipertrigliceridemia<br>Busulfán: fibrosis endomiocárdica, derrame pericárdico, hipertensión e hipotensión                                                                                                                                                                                                                                                                                                                                                                                    |
| Derivados del platino                             | En ADN, enlaces covalentes guanina-adenina                  | Cisplatino: espasmo o trombosis arterial, isquemia coronaria, cerebral, mesentérica, periférica, hipotensión o hipertensión arterial, arritmias                                                                                                                                                                                                                                                                                                                                                                                                                                         |
| Antimetabolitos                                   | Inhiben la síntesis de purinas/pirimidinas                  | 5-FU, capecitabina: espasmo coronario, angina o infarto de miocardio, arritmias, hipotensión arterial<br>Citarabina: pericarditis, angina<br>Clofarabina: arritmias, hipotensión/hipertensión, pericarditis                                                                                                                                                                                                                                                                                                                                                                             |
| Agentes sobre topoisomerasa                       | Modificación de ADN sin alterar nucleósidos                 | Doxorubicina: insuficiencia cardiaca, miopericarditis, fibrilación auricular, extrasistolia supraventricular, alteraciones del ECG, prolongación de QT, bradiarritmias<br>Epirubicina: arritmias, embolia arterial, alteraciones del ECG<br>Idarubicina: alteraciones del ECG<br>Mitoxantrona: arritmias, alteraciones del ECG, isquemia miocárdica, HTA                                                                                                                                                                                                                                |
| Agentes sobre microtúbulos                        | Interacción sobre microtúbulos, fundamentales en la mitosis | Vincristina: hipertensión/hipotensión, arritmias, isquemia e infarto miocárdico                                                                                                                                                                                                                                                                                                                                                                                                                                                                                                         |
| Inhibidores de tirosincinasa (moléculas pequeñas) | Bloquean reacción de tirosincinasa (señal intracelular)     | Imatinib: derrame pericárdico, anasarca, arritmias, HTA, fenómeno de Raynaud<br>Sunitinib: HTA, trombosis arterial y venosa, disección de aorta, arritmias, prolongación QT<br>Sorafenib: HTA, trombosis, infarto de miocardio, espasmo coronario<br>Pazopanib: HTA, trombosis, infarto de miocardio, bradicardia, prolongación de QT<br>Lapatinib: prolongación de QT, angina vasospástica<br>Dasatinib: derrame pericárdico, hipertensión pulmonar, prolongación de QT, HTA, arritmias<br>Ponatinib/nolotinib: enfermedad arterial periférica o cerebral, trombosis arterial o venosa |

|                                         |                                                    |                                                                                                                                                                                                            |
|-----------------------------------------|----------------------------------------------------|------------------------------------------------------------------------------------------------------------------------------------------------------------------------------------------------------------|
|                                         |                                                    | Ibrutinib: fibrilación auricular, eventos tromboembólicos                                                                                                                                                  |
| Anticuerpos monoclonales                | Bloquean señalización sobre receptores específicos | Bevacizumab: HTA, trombosis venosa o arterial<br>Trastuzumab: insuficiencia cardiaca, hipertensión/hipotensión arterial, arritmias, trombosis vascular<br>Alemtuzumab: hipotensión/hipertensión, arritmias |
| Inhibidores de proteosoma               | Inhibidor de proteosoma (degradación celular)      | Bortezomib y carfilzomib: bradicardia, isquemia, insuficiencia cardiaca                                                                                                                                    |
| Interferones/interleucinas              | Potenciación de respuesta inmunitaria              | Interferón alfa-2b: hipotensión, isquemia miocárdica, alteración del ECG, muerte súbita cardiaca                                                                                                           |
| Inhibidor de enzima histona deacetilasa | Inducción de apoptosis                             | Depsipéptido/vorinostat: prolongación de QT, taquiarritmias ventriculares                                                                                                                                  |
| Trióxido de arsénico                    | Apoptosis electiva, principalmente leucemias       | Trióxido de arsénico : prolongación de QT, taquicardia ventricular tipo <i>torsade des pointes</i>                                                                                                         |
| Radioterapia                            | Destrucción de ADN radicales libres                | Arterioesclerosis acelerada, pericarditis, esclerosis valvular. Fibrilación auricular                                                                                                                      |

HTA: hipertensión arterial.

**Tabla 3 del material suplementario**Ecocardiografía en la monitorización de pacientes onco-hematológicos<sup>14</sup>**Protocolo optimizado**Ecocardiografía transtorácica estándar según recomendaciones de ASE/EACVI<sup>13</sup>

Ecocardiografía con contraste si hay mala visualización del borde endocárdico en más de 2 segmentos contiguos

Siempre que esté disponible y en centros con experiencia

- Estudio de deformación miocárdica para cuantificar el SLG

Adquirir imágenes 2D de los planos apicales de 4, 3, y 2 cámaras, con *frame rate* > 50 Hz

- Cuantificación de la FEVI con ecocardiografía tridimensional

Adquirir un volumen completo del ventrículo izquierdo en 4 cámaras

**Datos que reseñar en el informe**

Esquema terapéutico antitumoral y tipo de estudio (basal, seguimiento, final de tratamiento)

Presión arterial y frecuencia cardiaca

Datos mínimos del informe

- Evaluación de la función sistólica del ventrículo izquierdo
  - FEVI: FEVI-3D siempre que esté disponible; en caso contrario, FEVI-2D por Simpson biplano (+/- contraste)
  - Parámetros de función longitudinal (SLG siempre que esté disponible; en caso contrario, excursión sistólica del anillo mitral [MAPSE] y velocidad de la onda sistólica tisular del anillo mitral [S'] lateral)
- Volumen de la aurícula izquierda
- Evaluación del ventrículo derecho (velocidad de la onda sistólica tisular del anillo tricúspide [S'], excursión sistólica del anillo tricúspide [TAPSE] y/o fracción de acortamiento)
- Presión sistólica pulmonar

En caso de variaciones significativas respecto a estudios previos, se debe reseñarlos en el informe

Para la comparación del SLG, se precisa el uso de los mismos equipo y *software* de análisis

2D: bidimensional; 3D: tridimensional; ASE: *American Society of Echocardiography*; EACVI: *European Association of Cardiovascular Imaging*; FEVI: fracción de eyección del ventrículo izquierdo; SLG: *strain* longitudinal global.

**Tabla 4 del material suplementario**Incidencia de hipertensión arterial de los principales fármacos antiangiogénicos<sup>53,54</sup>

| Fármaco                                           | Mecanismo de acción                                                                                                                                                                        | Indicación                                                                                                                                                                                                               | Incidencia HTA (%) | Incidencia HTA grado 3-4 (%) |
|---------------------------------------------------|--------------------------------------------------------------------------------------------------------------------------------------------------------------------------------------------|--------------------------------------------------------------------------------------------------------------------------------------------------------------------------------------------------------------------------|--------------------|------------------------------|
| <b>Anticuerpo monoclonal humanizado anti-VEGF</b> |                                                                                                                                                                                            |                                                                                                                                                                                                                          |                    |                              |
| Bevacizumab                                       | Anticuerpo monoclonal tipo IgG kappa. Inhibe la unión de VEGF a sus receptores (1 y 2) en la superficie de las células endoteliales. Disminuye la angiogénesis y la proliferación celular. | Cáncer metastásico de mama, de colon/recto; cáncer de pulmón (no microcítico); cáncer de células renales avanzado y/o metastásico; cáncer de ovario epitelial, trompa de Falopio o peritoneal primario; cáncer de cérvix | 20,5-27,1          | 6,1-10,2                     |
| <b>Inhibidores de la tirosincinasa (ITK)</b>      |                                                                                                                                                                                            |                                                                                                                                                                                                                          |                    |                              |
| Sorafenib                                         | Inhibidores del receptor de VEGF<br>Inhibidores de la angiogénesis                                                                                                                         | Carcinoma hepatocelular; carcinoma de células renales; carcinoma diferenciado de tiroides refractario a tratamiento con yodo                                                                                             | 19,3-26,9          | 4,7-7,3                      |
| Sunitinib                                         | Inhibidores del receptor de VEGF<br>Inhibidores de la angiogénesis                                                                                                                         | Tumores del estroma gastrointestinal (GIST); Carcinoma de células renales metastásico                                                                                                                                    | 18,7-24,8          | 5,3-8,8                      |
| Axitinib                                          | Inhibidores del receptor de VEGF<br>Inhibidores de la angiogénesis                                                                                                                         | Carcinoma avanzado de células renales                                                                                                                                                                                    | 30,9-50,2          | 6,7-24                       |
| Vandetanib                                        | Inhibidores del receptor de VEGF<br>Inhibidores de la angiogénesis                                                                                                                         | Cáncer medular de tiroides no resecable localmente avanzado o metastásico                                                                                                                                                | 18,1-30,2          | 3,3-9,5                      |
| Regorafenib                                       | Inhibidores del receptor de VEGF<br>Inhibidores de la angiogénesis                                                                                                                         | Cáncer colorrectal metastásico; GIST irresecable o metastásico                                                                                                                                                           | 30,8-59,0          | 5,2-27,1                     |

HTA: hipertensión arterial; VEGF: factor de crecimiento del endotelio vascular.
